# Supplementary material
Source: PubMed Central journal article supplement (PMC6086713)
Supplement: CJN.11321017SupplementaryData.pdf [file CJN.11321017SupplementaryData.pdf]

*Supplemental material is neither peer-reviewed nor thoroughly edited by CJASN. The authors alone are responsible for the accuracy and presentation of the material.*

**Title:** Alteration of high-density lipoprotein protein composition with hemodialysis initiation

## **Supplemental Material**

Supplemental Table 1: Baseline participant characteristics of HFM study compared to HFM proteome study

Supplemental Table 2: Correlation between relative HDL protein abundance and ABCA1-mediated cholesterol efflux

**Supplemental Table 1: Baseline participant characteristics of HFM study compared to HFM proteome study**

|                                                         | <sup>1</sup> HFM proteome<br>n=253 | HFM<br>n=602 |
|---------------------------------------------------------|------------------------------------|--------------|
| Age (years)                                             | 55.9 (12.9)                        | 55.1 (13.4)  |
| Race                                                    |                                    |              |
| White                                                   | 126 (49.8)                         | 283 (47.0)   |
| Black                                                   | 106 (41.9)                         | 264 (43.8)   |
| Other                                                   | 21 (8.30)                          | 55 (9.1)     |
| Male sex                                                | 169 (66.8)                         | 423 (70.3)   |
| Smoking                                                 |                                    |              |
| Current                                                 | 45 (17.8)                          | 106 (17.6)   |
| Former                                                  | 89 (35.2)                          | 222 (36.9)   |
| Never                                                   | 119 (47.0)                         | 274 (45.5)   |
| History of diabetes                                     | 150 (59.3)                         | 353 (58.6)   |
| Prevalent cardiovascular disease                        | 114 (45.1)                         | 290 (48.2)   |
| Maintenance hemodialysis                                | 143 (56.5)                         | 383 (63.6)   |
| <sup>2</sup> Dialysis duration (months)                 | 4.6 (3.4)                          | 4.3 (3.2)    |
| BMI (kg/m <sup>2</sup> )                                | 30.3 (7.7)                         | 30.4 (7.5)   |
| Systolic blood pressure (mmHg)                          | 153.5 (23.3)                       | 151.2 (23.8) |
| Statin use                                              | 133 (54.5)                         | 336 (55.8)   |
| Niacin use                                              | 3 (1.2)                            | 10 (1.7)     |
| Fibrate use                                             | 10 (4.1)                           | 22 (3.6)     |
| Insulin use                                             | 94 (38.5)                          | 232 (38.5)   |
| <sup>3</sup> Estimated GFR (mL/min/1.73m <sup>2</sup> ) | 12.8 (4.4)                         | 13.7 (4.7)   |
| Albumin (g/dL)                                          | 3.5 (0.6)                          | 3.6 (0.6)    |
| Hemoglobin (g/dL)                                       | 10.3 (1.6)                         | 10.5 (1.7)   |

GFR=glomerular filtration rate

<sup>1</sup>Excludes HFM Study participants on hemodialysis for longer than one year, receiving peritoneal dialysis, or whose plasma samples had insufficient volume for HDL proteome analysis.

<sup>2</sup>Excludes participants on hemodialysis for longer than one year.

<sup>3</sup>Excludes participants on dialysis.

Supplemental material is neither peer-reviewed nor thoroughly edited by CJASN. The authors alone are responsible for the accuracy and presentation of the material.

| HDL-protein <sup>1</sup> | Correlation coefficient <sup>2</sup> | p-value |
|--------------------------|--------------------------------------|---------|
| SAA2                     | -0.06                                | 0.62    |
| SAA1                     | -0.14                                | 0.21    |
| HBB                      | -0.05                                | 0.65    |
| HPR                      | 0.10                                 | 0.36    |
| CETP                     | 0.06                                 | 0.61    |
| PLTP                     | 0.05                                 | 0.68    |
| APOE                     | 0.03                                 | 0.77    |
| SAA4                     | 0.02                                 | 0.87    |

<sup>1</sup> Relative HDL protein abundance per 10µg total HDL particle  
<sup>2</sup> Participants with measured cholesterol efflux capacity (n=80)
